# Supplementary material for: High efficient multisites genome editing in allotetraploid cotton (Gossypium hirsutum) using CRISPR/Cas9 system
Source: PubMed Central journal article supplement (PMC5785356; doi:10.1111/pbi.12755), 2017-06-20
Supplement: PBI-16-137-s001.pdf [file PBI-16-137-s001.pdf]

```

AtU6-26: -----*-----960-----*-----920-----*-----880-----
Ghu6-9 : ATGTCATTGCTACAAATTGCGAGTAGGCTTTGCAATTAATAACATTAATCCAAACCATTAGATGATGCTTAGTATTIAATATTTATCCTCAGCCCATGATGGCTGAGGCCCTCGAGATCAIAAACCCAG 127
Ghu6-7 : CTTCTAGATTAATCGATGCTCCACCTGCTTTTTCATTTCTTTATGGAAAGGCTTAAAGAGATATGTAAGTACTCATACAGTTTTCACAAAACAAACATTTCTGTTAATCACAACCTTTCTAT 127
Ghu6-1 : ATTATTATTAATAATAAATTAAGTTTGCATTAAGTTATTTTATATAAAAAABAACTATCAIAGAACTCTTTTTCGGAAAATGATTIATGTTTTTCAAATGGIAGTCAATTTIACA 127
Ghu6-4 : ATAGCCATTAATAGTGGTTAATTTTTGAAAACIATTAATATGRTTATTATCATTACTTAAAGGCTCTGGATTTTIATTTATTTTAAAGCTTATGGATGTTAATCTTGTACATTTTAT 127

AtU6-26: -----*-----840-----*-----800-----*-----760-----
Ghu6-9 : TTTAAAAATTTCAGACGCTCAATGCCATTTGGATCAAGCAATCCCFCGAGATTGGTTATTTGAAAGCTTCGGAAAATGGGAAAAGGATGGTGAGCTCGAGAATAAGATCAAGGCTAAGCAAAAAGGA 254
Ghu6-7 : TTTCAGGAACCAIAACTTATACACTTTTACACTAGCTTTIATACCCAGAAACAAACATTTAATGGTACAAATTTIAATTTCCATTAATCAGATGAGTATACGCAAAAACCCCAAAATCTTTAA 254
Ghu6-1 : GCAAAAAGCTTTTTTTCATGACCTAATAATCATTTTCTGTTACCTAATTTATTTCTGTGAAAACAAACAGGAGAATTCGAAAATAATTTCCGTAAGTCAATTTCCATGAAAACAAACACC 254
Ghu6-4 : TTTGCATTGTTTTGAACAATCTCATIACAAGTTIAGTCAGAAITATTAATAATTTCTTCAACAIAATAAATAGGATGACAATTCGGCTTGTAGTGCATTTGAACTCAGGCCCTCCTACATTGACA 254

AtU6-26: -----*-----720-----*-----680-----*-----640-----*
Ghu6-9 : ACTTGCCAAAGTGAGCAATAAGCTCGAGGAGGCAGAAACTCATGGCAGACCCGGGAAACAAAGATGAGCAAAAACAGGAACTTCTGCGTGAGAGGTGTTGACTACGATTGCTCGGTGAGTGT 381
Ghu6-7 : ATCACAATCTCAGCAGGATTAACCAACTATCTTATGCGAGCTTTTCTCAIAGACAAAGAAAGACGGATGATCAAAAACAIATAGTTGACATTTGGCCCAAAAIACTTGAIA 381
Ghu6-1 : CTAATCAATTCATGATATTGATTCCGAGATCAATTCATTAATCTTTCTCAAAAACCAATTTGCAATTAATTCGATTAAATCAATTTGACTGATTGGTCTGATTCCAAIAACCTIATAA 381
Ghu6-4 : AGAATGTTCAATGCCAATCGAGCAATTCATCGGCCTTTTATGTGAATTTACTTCCCTCGTCAIAGTTTTIATAIATATTCATTAAAAATTTTGAACCTTGAGATGAIATTAATGGG 381

AtU6-26: -----*-----600-----*-----560-----*-----520-----*
Ghu6-9 : CTCATCGACCTAGCGAATGGATGCTCTTATGCTATTAGTIACCATTIATATTTCAATTAGAATGCATCACAIATTTGAACIATGTTIATATGATTAATCTCTGTIAAGGAATATCATCAA 508
Ghu6-7 : AGTTGCCATTTGACAACATACATCCACATCTCCATGATCGTTIATTCATTCGTTTACAAIACCTTTTIAATGTTCCAGTCTIAAAAATGAAAAAATAATGAAATGGATGAAATGCTTATA 508
Ghu6-1 : AGCTATAGCTAAAATCTAIACTIATAAATTTCCATAAAGCTAAGAGTTAATTTATTAATAAGTAAAGTATTTGATTAATAAATTTTCTGTTAAATTTTAAATTTTAAATTTTAA 508
Ghu6-4 : AGAATTTIAAACCTTGAATATGAATGTAAAAAGGAACATGAGAATTAATAAATAAATTTAATTAAGATCTTIAATAATCAACAATCAIATAATCGIAGTTCAAATTAATTTAATTTGATCA 508

AtU6-26: -----*-----480-----*-----440-----*-----400-----*
Ghu6-9 : AGGGTATCTGGAACTAACAATCTTTGCTTCCAGATAACGGTTCCAAACATTCGCTACGACCGACTGCCGTAGCAAAAAGAGGCCAATGAATGAAATGAGACCGCTGTAGTTGACGAT 635
Ghu6-7 : GTCCATGAATTTAAAGGAATGCGGTTGAATATTTCCATCGATAACAIACAIATCTGAGIATGTTCCBAIAATAATCAIATTTGGGATTTACCTTTTAAAGCAATTTGATTTGAT 635
Ghu6-1 : ATTATACCTTATGGACACTIATTTACTTCTTCCACCTGGTGTGAAGTTTACTCATTGACGAAATAATTTCTTTIATTTGTTATTTTTTAAATTTIATAAATTAATAAAGATTIACATTTGAT 635
Ghu6-4 : ATAAATTCATCTCATTTGATTTGAATTTAAAACAATAAATTTGAACATAACTACTTGAATGATTTGAGCTGACTATCATTTGAAATGAAAACATGACAGCCAAATTTAACCACTTGA 635

AtU6-26: -----*-----360-----*-----320-----*-----280-----*-----240-----
Ghu6-9 : ATACAGTTTTTTTGGTTATCAGCTTACATTTCTTGAACCGTAGCTTTGTTTTCTTCTTTTAACTTTCCATTCGGAGTTTGTGAICTGTTTCAATAGTTTGTCCAGGATAGAAATGATTAG 210
Ghu6-7 : CTGGCGTTTGTCTTCTGTTCTTTTCATTAATACCAGAAIACCAATATGCATCCCTGTCAATGAAATTTGATAAATGAAATCTTGTGCAIACCTTCCATAAGCTGCAATAGTTTCCAAACA 762
Ghu6-1 : GGTAAIACAATAATTTCCAAGGCAACCCAAATATTTTAAATTTAACCTIACACTGTGGTAAATCAAACTAATAGTAAACCCGATTTGTAATGTGAAGCAATAAGAAAGTACATTTGGTTATA 762
Ghu6-4 : AAAGTTTCAACCAAAAACATCATGAATTTAAACCATTATTTTATTTTAAATGATTTTAAAATAAATGTTGAATTAATAATTTATTAATAAATTTIAGCAATCATATTAACATAAIAA 762
Ghu6-4 : CACAATAACAATTAATAATGACTCAATATGAAGTTGAATAAACACAATTAATAAATTTTTTAGTTAATAAATAAATTTIACCTTTAATTTGATTTGATTTTCTTTATTT 762

AtU6-26: -----*-----200-----*-----160-----*-----120-----
Ghu6-9 : GCAATCGAACCTTCAAGAAATTTGATTAATAAACAATCTTCAATCTTAAAGATATGAAATATCTTCAAAGGCCCTGGGAATCTGAAAGAAGAGAAGCAGGCCATTIATAAGGAAAAGCAATA 337
Ghu6-7 : TTTACTCTGTGCTIACGATTAATCTCTGTIAAGGAATATCGTTCCAAAGAGTCAATCGCGAAATGTAACATCTTTCTCATCCAGGCTGATGAAIATGIAATGGAACCTGCCACTGACCCAGAGT 889
Ghu6-1 : TAATAATTTTTCTTAATAATCTAAATATCAGTTGGGAAAGTATAAACACTGAGCTTGGCCGCTGTGTIAACCTGTTTTTCAATGTGCCACTCCAAGACATCAGGCCCTIATTCAGGCTGGC 889
Ghu6-4 : AAATTAACAAGTIAATGTTTCAATAATTTAGCAATGCAATCTTGGATAGTCAACAAAAGGCAACATTTGATTTACAGACCAATAGCCCATAGCCCTCGTTTTGAGCCCATACATTTGGGACT 889
Ghu6-4 : AAATTTCTACACTTTTCAATTCAAAAGGATTTAGAGCTGGGTTAATAATAAACGCAATTTTTTGGGTCTAATAAATAAATAAATTTGCTAGCCACTGTTTTTGGTGCTTCAACCAAGACATAA 889

AtU6-26: -----*-----80-----*-----40-----*-----0-----*
Ghu6-9 : GIATTTCTIATATAGGCCATTTAAGTTGAAAACAATCTTCAAAACTCCACATCGCTTAGATAGAAAGCGAACCTGACTTTIATAIACAGCTAGAGTCCFAGTAGTATGTGCCCTTCGGGGACAT 464
Ghu6-7 : AGGTTTGTCTTCGGGGACATCTTCAGGCCATGGTCAAAAATCTTCCCACATTTGCTAAGAAACCTTAAAGGAAAGGCTTTTATAIATAGCGAAAGAGCAGCACAATCTGCCCTTCGGGGACAT 1016
Ghu6-1 : ATGGTCAGGACGTGGTAGCATACTTCAGGATCTGGTTAGAAAATTTCCCATATCGCTAAGAACTATACACACAGGCTTTIATAIATAGCGAAAGAGCATCAGATGGTTGTCCCTTCGGGGACAT 1016
Ghu6-4 : CAGAGTCCGGGAGGCTGGCTCATGATTIACCTGGIATCCACTAAATATCCACATCCCTIAGCGGACAAATAAGCTAACCTTTIATATAGCTGAAAGCAGCACCAGGATTTGCCCTTCGGGGACAT 1016
Ghu6-4 : ACTGCTACTGGGCTTGTAGTCAAGTTCTIATTTGAAAAGCAGCCAAATATCCCGCATCGCTAAGAGTTTGGAAATTTIATTTGTTIATATAGCFAATACAGGAACCTIATGTGCCCTTCGGGGACAT 1016

AtU6-26: -----*-----40-----*-----80-----*-----120-----*
Ghu6-9 : CCGATAAAATTTGGAACGATACAGAGAAGATTAGCATGGCCCCGCGCAAGGATGACACGCACAATTCGAGAATGGTCCAAATTTTTTTTGCAAAATTTTCAGATCGATTTCTTCTCTCTCTGTTTC 591
Ghu6-7 : CCGATAAAATTTGGAACGATACAGAGAAGATTAGCATGGCCCCGCGCAAGGATGACACGCACAATTCGAGAATGGTCCAAATTTTTTTTGCAAAATTTTCCACATTTTAAAGCTCTCTCTCTTTT 1143
Ghu6-1 : CCGATAAAATTTGGAACGATACAGAGAAGATTAGCATGGCCCCGCGCAAGGATGACACGCACAATTCGAGAATGGTCCAAATTTTTTTTGCAAAATTTTCCACATTTIACAGCTCTCTCTTTT 1143
Ghu6-4 : CCGATAAAATTTGGAACGATACAGAGAAGATTAGCATGGCCCCGCGCAAGGATGACACGCACAATTCGAGAATGGTCCAAATTTTTTTTGCAAAATTTTCCCTCTCTCTCTTTGAAATTTTCGA 1143
Ghu6-4 : CCGATAAAATTTGGAACGATACAGAGAAGATTAGCATGGCCCCGCGCAAGGATGACACGCACAATTCGAGAATGGTCCAAATTTTTTTTCTTGATTTTTTTGGCAATTTTACAGCTCTCTTTCCA 1143

```

**Figure S1.** Cloning of *AtU6-26* homologous genes and their promoters in cotton. The conserved coding regions are in black background and underlined with a red line. Two conserved elements in the promoter region are indicated in red boxes with annotation.

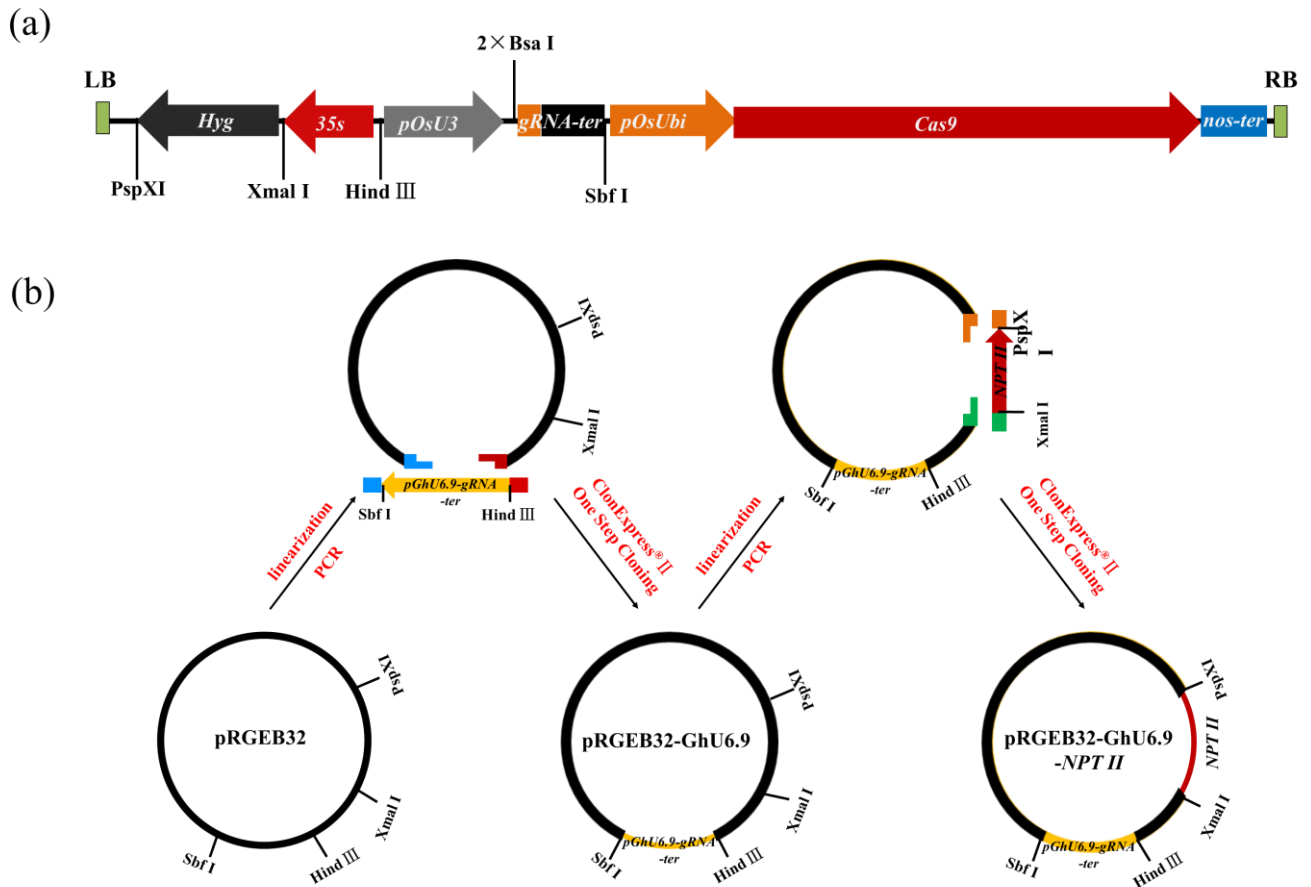

**Figure S2.** Modification of pRGE32 vector for cotton gene transformation. (a) Schematic of the T-DNA region of vector pRGE32. Restriction enzyme sites near the selection marker *Hyg* and *pOsU3* are labeled below. Two reverse *Bsa* I sites are the cloning sites to insert sgRNAs. (b) Detailed procedure of vector modification is illustrated. PCR adaptors that are homologous to the linearized vector are shown in same color.

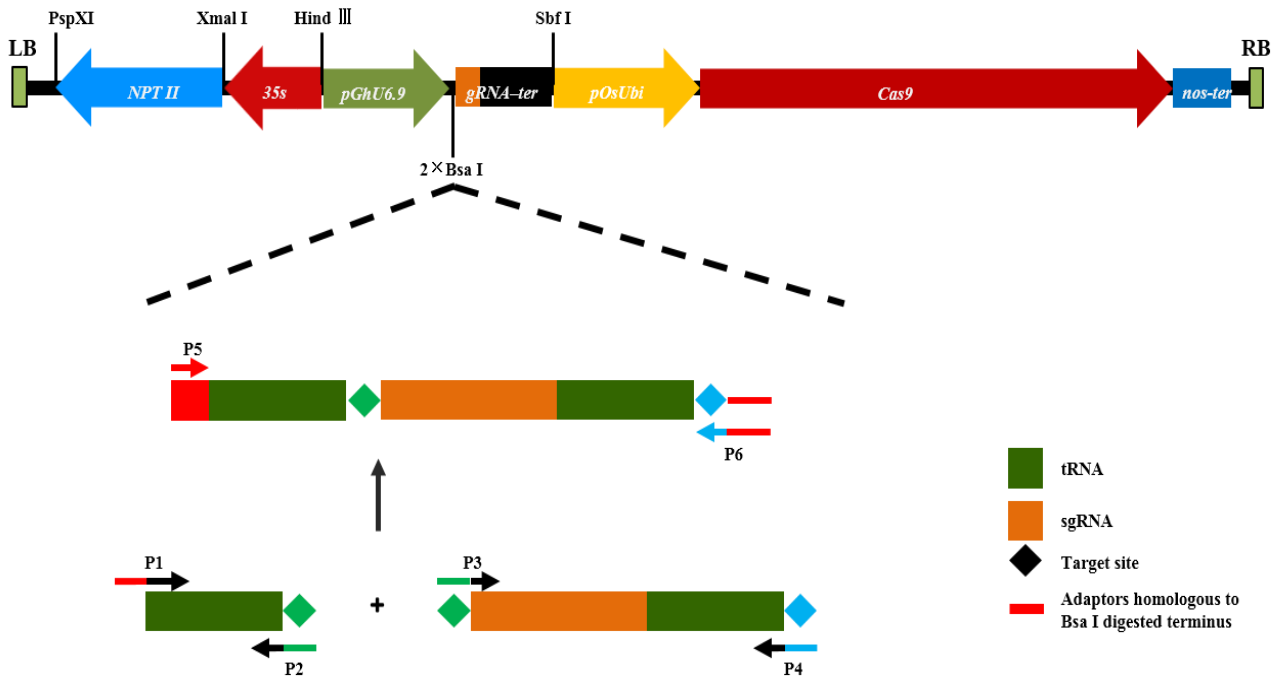

**Figure S3.** The procedure for pPTG vectors construction with one step cloning method. Above diagram shows the T-DNA region of expression vector pRGEB32-GhU6.9-NPT II. To combine two sgRNAs in one vector, two separate PCR products are obtained with primer pairs P1-P2 and P3-P4, respectively. These two fragments are assembled with overlapping extension PCR with primer pair P5-P6. The final PCR product is designed to be inserted into the Bsa I linearized expression vector using one step cloning method.

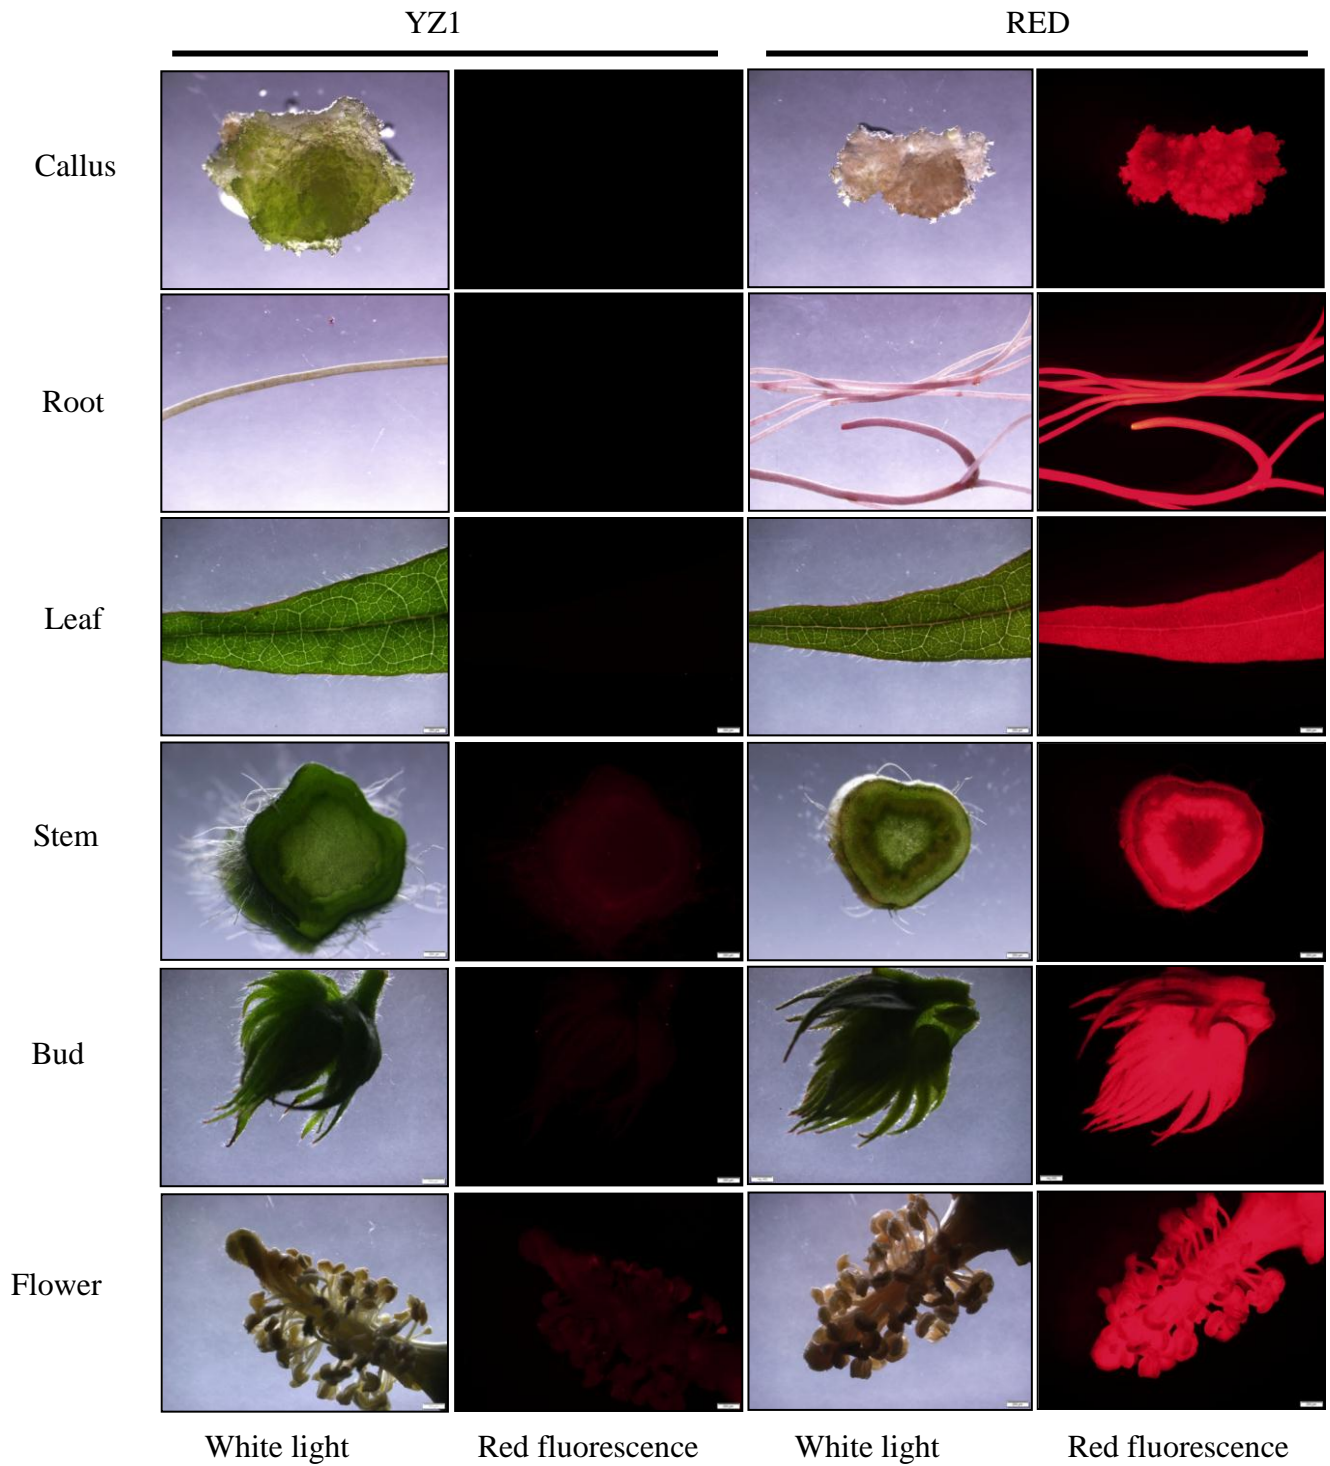

**Figure S4.** The *DsRed2* transgenic cotton line RED has red fluorescence in all tissues. Samples were observed under a stereomicroscope in the bright field and the red fluorescence field at an excitation wavelength of 530nm to 550nm.

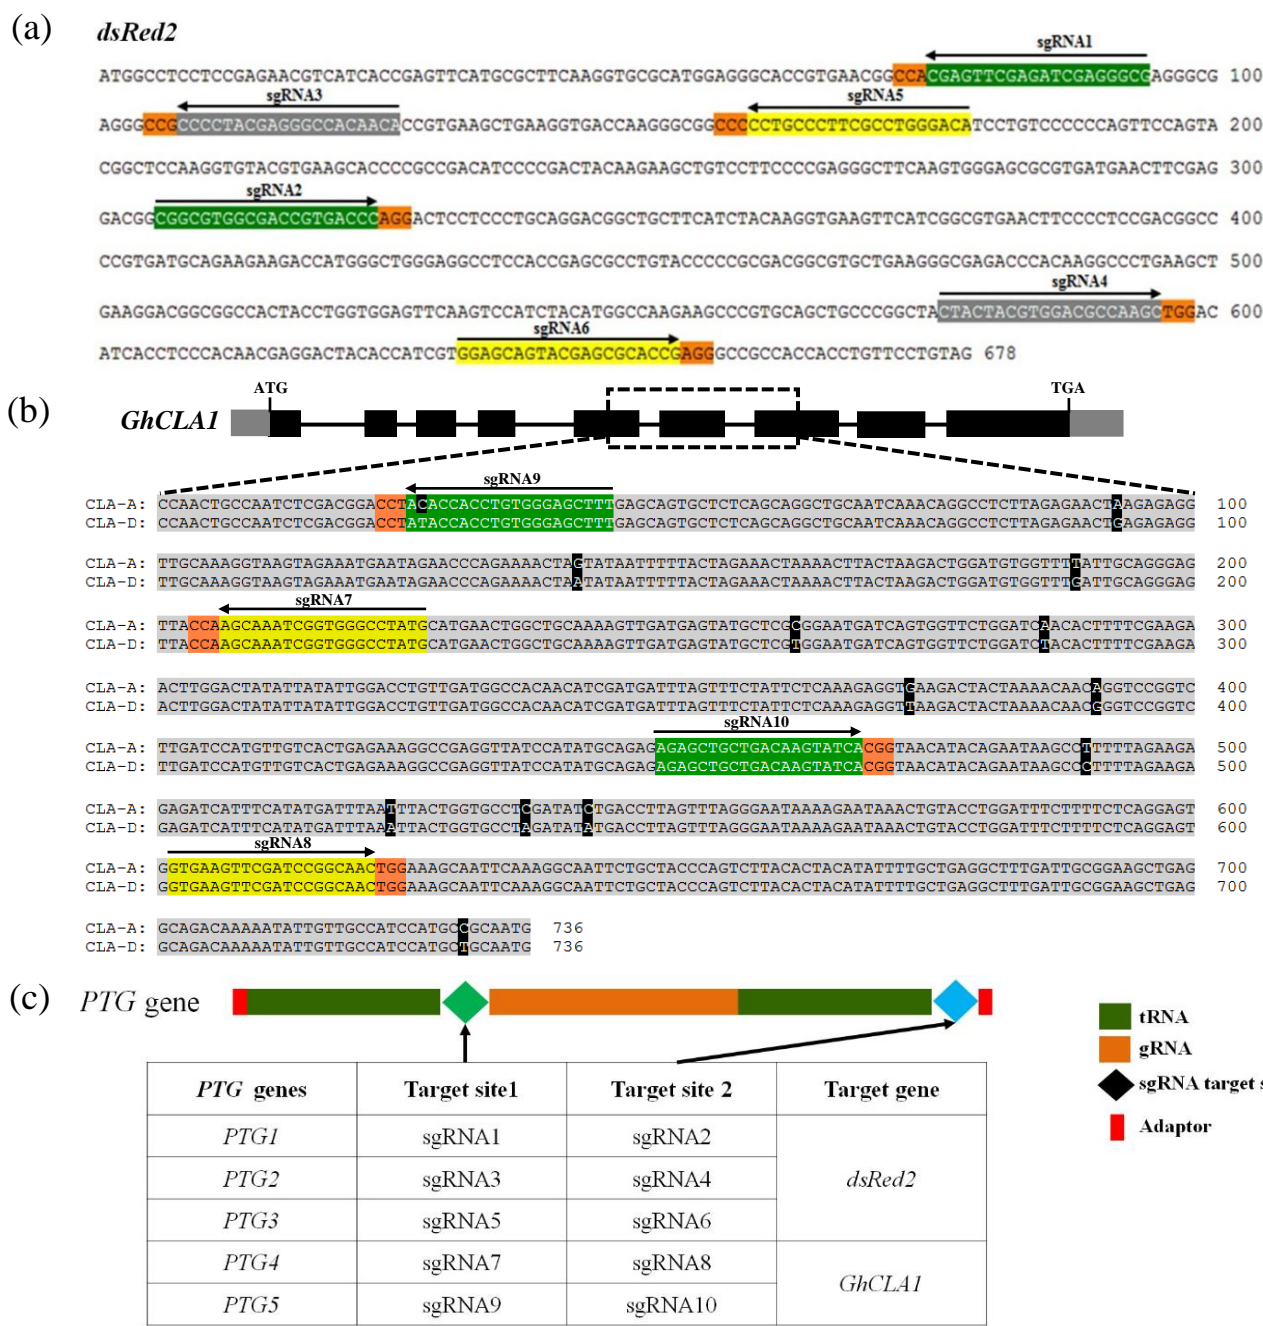

**Figure S5.** Designed *PTG* genes for *DsRed2* and *GhCLA1* editing. (a) The designed sgRNA target sites to *DsRed2*. (b) The designed sgRNA target sites to *GhCLA1*. The sgRNA target sites are highlighted in yellow or green, with the recognition direction indicated with arrows. sgRNAs chosen to be combined in one vector are illustrated in the same color. The PAM regions are highlighted in orange. Different SNPs in *GhCLA1* DNA sequences are highlighted in black. (c) The illustration of a *PTG* gene. Compositions of different *PTG* gene for the target genes are listed.

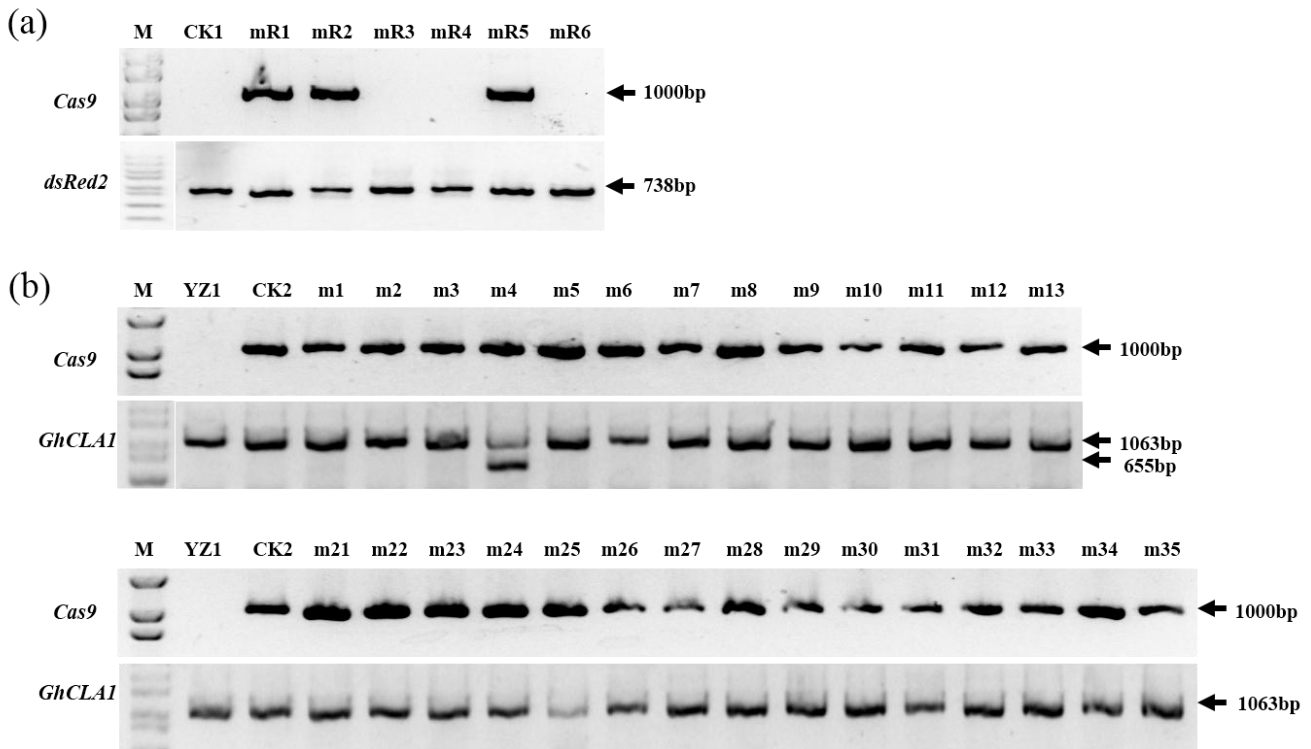

**Figure S6.** Transgenic positivity check in the regenerated T0 plants with Cas9 specific primers. (a) PCR analysis of *Cas9* positivity and *DsRed2*. (b) PCR analysis of *Cas9* positivity and *GhCLA1*. M, marker. CK1, a Cas9 positive control without sgRNA targeting in *DsRed2* transgenic background. CK2, a Cas9 positive control without sgRNA targeting in YZ1 background.

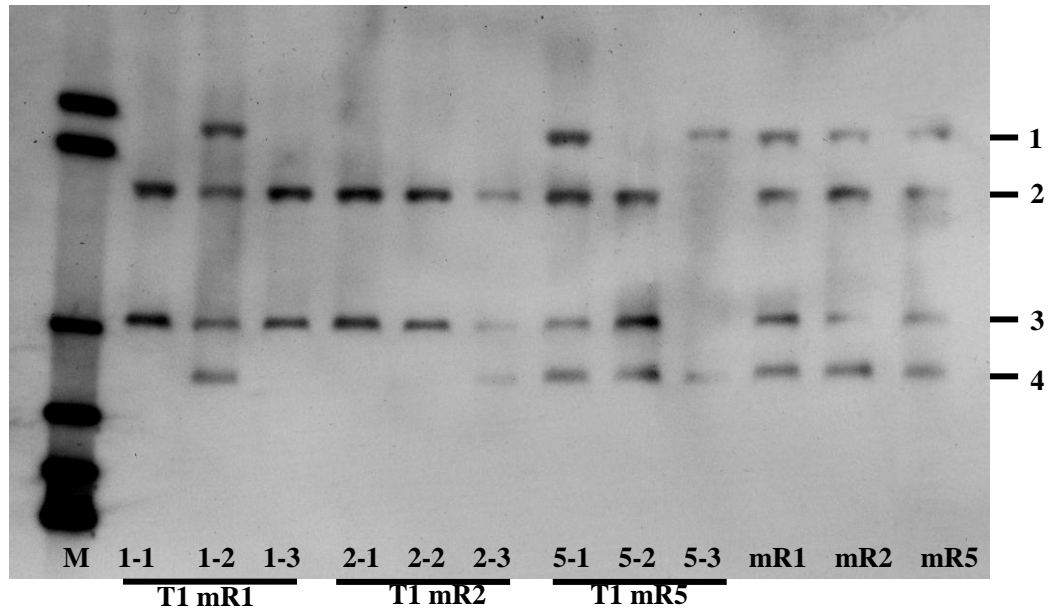

| T0 Lines | <i>DsRed2</i> copies | Mutation type at sgRNA5 | T1 progenies | <i>DsRed2</i> copies | Mutation type at sgRNA5 |
|----------|----------------------|-------------------------|--------------|----------------------|-------------------------|
| mR1      | 1, 2, 3, 4           | +G , -G                 | 1-1          | 2, 3                 | +G                      |
|          |                      |                         | 1-2          | 1, 2, 3, 4           | +G , -G                 |
|          |                      |                         | 1-3          | 2, 3                 | +G                      |
| mR2      | 1, 2, 3, 4           | +G , -G                 | 2-1          | 2, 3                 | +G                      |
|          |                      |                         | 2-2          | 2, 3                 | +G                      |
|          |                      |                         | 3-3          | 2, 3, 4              | +G , -G                 |
| mR5      | 1, 2, 3, 4           | +G , -G                 | 5-1          | 1, 2, 3, 4           | +G , -G                 |
|          |                      |                         | 5-2          | 2, 3, 4              | +G , -G                 |
|          |                      |                         | 5-3          | 1, 4                 | +G , -G                 |

**Figure S7.** Southern blotting analysis of *DsRed2* gene copies in T0 plants and their T1 progenies. M, marker. mR1, mR2 and mR5 represents the three T0 cotton lines. Three independent T1 progenies for each T0 lines were analyzed. Number 1 to 4 represents the independent gene copies of *DsRed2*. A summary of the Southern result and mutation genotype of T0 and T1 plants is listed. The T1 progenies inherited *DsRed2* mutations from corresponding T0 plants. *DsRed2* copies of 1, 2 and 3 have +G mutation type. The copy 4 carries -G mutation type.

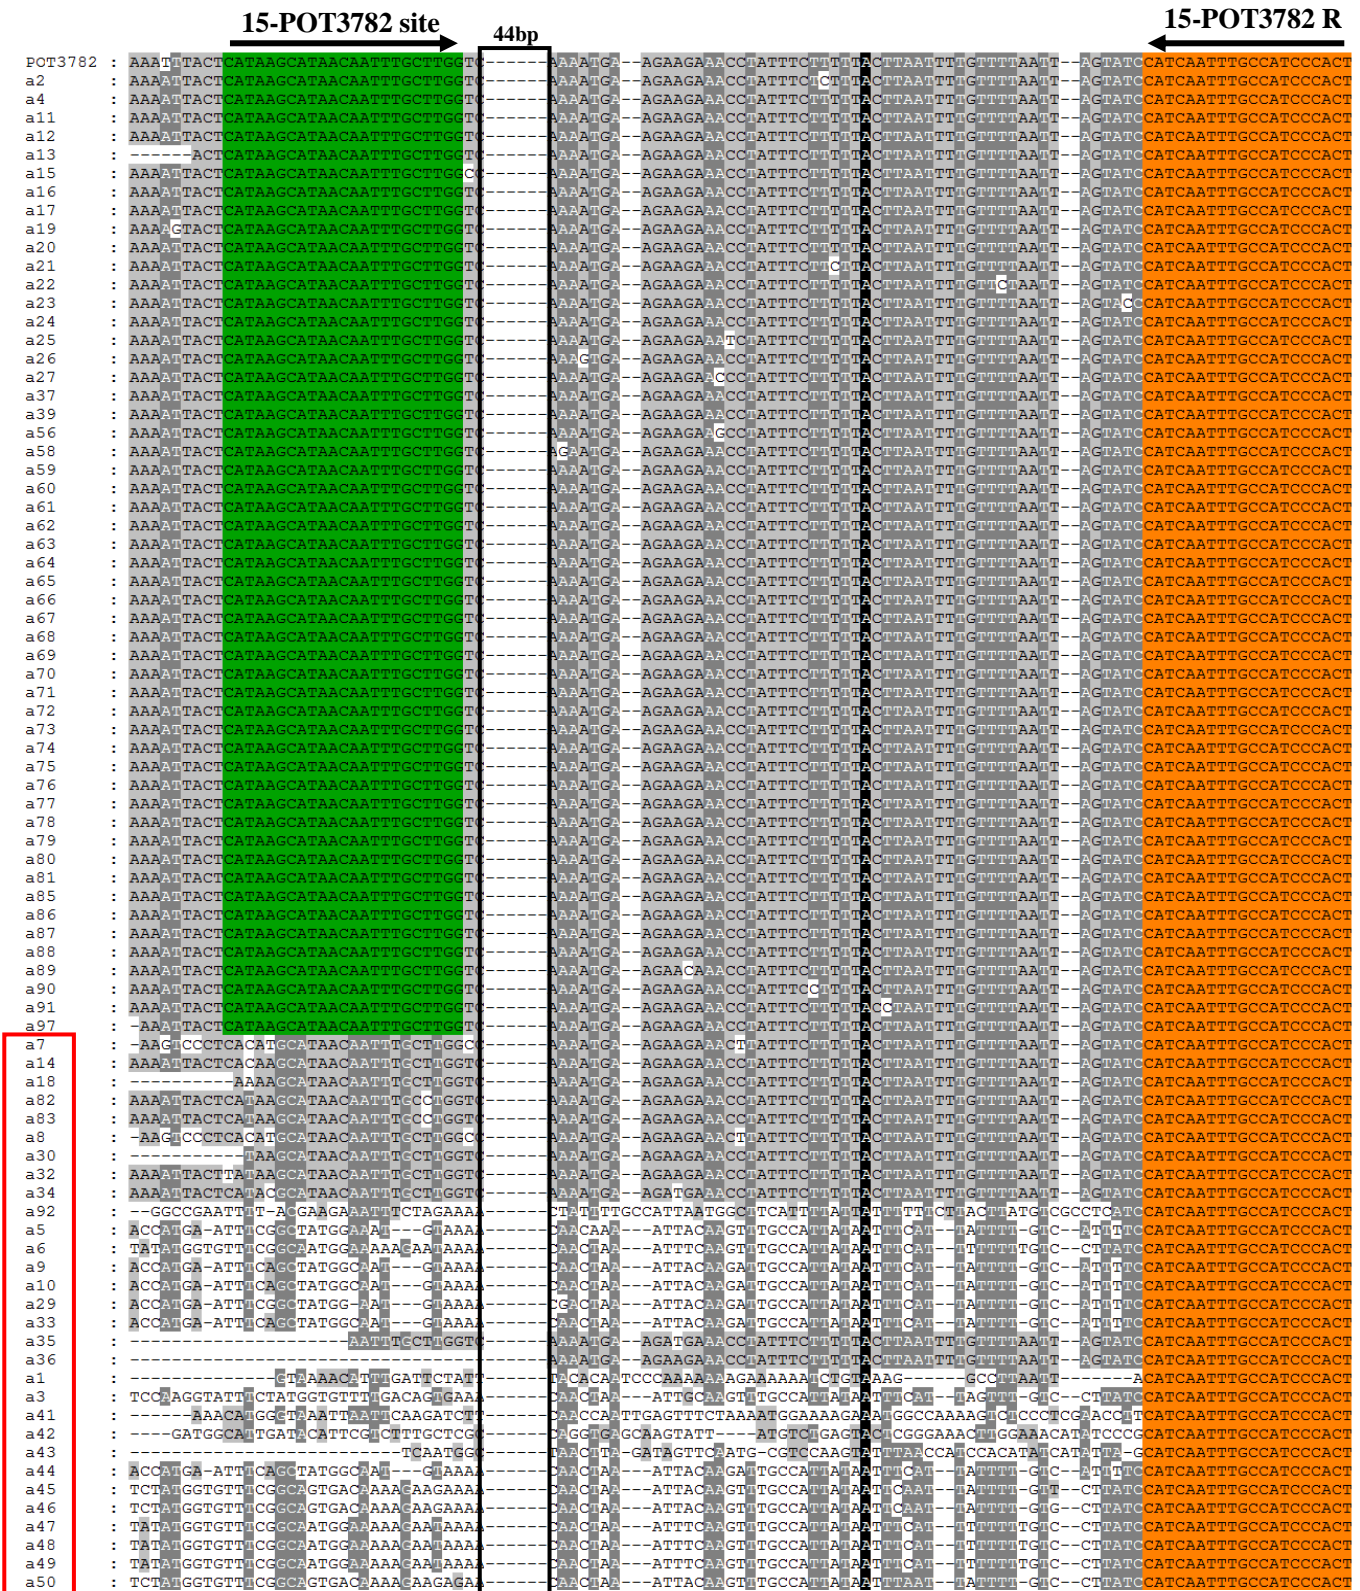

**Figure S8** An example of off-target effect analysis at one potential off-target site 15\_POT3782. The potential off-target site and the reverse primer for PCR process are highlighted in green and orange background, respectively. The gap of omitted nucleotides is labeled above. The reads in red box were unpredicted sequences that might be generated because of mismatch of primers.



**Table S1. Barcoded-primers for *GhCLA1* mutation genotyping in independent T0 transgenic lines with high-throughput sequencing method**

| Lines                                       | Forward primer                             | Reverse primer                          |
|---------------------------------------------|--------------------------------------------|-----------------------------------------|
| PTG3                                        | m1 <b>cgactg</b> TAAGACTGGATGTGGTGTATTGC   | <b>gctagt</b> AAGATGTAGTGTAAGACTGGGTAGC |
|                                             | m2 <b>cgactg</b> TAAGACTGGATGTGGTGTATTGC   | <b>atgcta</b> AAGATGTAGTGTAAGACTGGGTAGC |
|                                             | m3 <b>cgactg</b> TAAGACTGGATGTGGTGTATTGC   | <b>ctgcga</b> AAGATGTAGTGTAAGACTGGGTAGC |
|                                             | m4 <b>cgactg</b> TAAGACTGGATGTGGTGTATTGC   | <b>gtactc</b> AAGATGTAGTGTAAGACTGGGTAGC |
|                                             | m5 <b>cgactg</b> TAAGACTGGATGTGGTGTATTGC   | <b>tctagc</b> AAGATGTAGTGTAAGACTGGGTAGC |
|                                             | m6 <b>cgactg</b> TAAGACTGGATGTGGTGTATTGC   | <b>gagtca</b> AAGATGTAGTGTAAGACTGGGTAGC |
|                                             | m7 <b>tgatag</b> TAAGACTGGATGTGGTGTATTGC   | <b>gctagt</b> AAGATGTAGTGTAAGACTGGGTAGC |
|                                             | m8 <b>tgatag</b> TAAGACTGGATGTGGTGTATTGC   | <b>atgcta</b> AAGATGTAGTGTAAGACTGGGTAGC |
|                                             | m9 <b>tgatag</b> TAAGACTGGATGTGGTGTATTGC   | <b>ctgcga</b> AAGATGTAGTGTAAGACTGGGTAGC |
|                                             | m10 <b>tgatag</b> TAAGACTGGATGTGGTGTATTGC  | <b>gtactc</b> AAGATGTAGTGTAAGACTGGGTAGC |
|                                             | m11 <b>tgatag</b> TAAGACTGGATGTGGTGTATTGC  | <b>tctagc</b> AAGATGTAGTGTAAGACTGGGTAGC |
|                                             | m12 <b>tgatag</b> TAAGACTGGATGTGGTGTATTGC  | <b>gagtca</b> AAGATGTAGTGTAAGACTGGGTAGC |
|                                             | m13 <b>gtcacg</b> TAAGACTGGATGTGGTGTATTGC  | <b>gtactc</b> AAGATGTAGTGTAAGACTGGGTAGC |
| yz1-1 <b>gtcacg</b> TAAGACTGGATGTGGTGTATTGC | <b>tctagc</b> AAGATGTAGTGTAAGACTGGGTAGC    |                                         |
| PTG4                                        | m21 <b>gtcacg</b> TCTCTGCCAACTGCCAATCTCG   | <b>gagtca</b> TCTCTTCTAAAAAGGCTTATTCTGT |
|                                             | m22 <b>atgatg</b> TCTCTGCCAACTGCCAATCTCG   | <b>gctagt</b> TCTCTTCTAAAAAGGCTTATTCTGT |
|                                             | m23 <b>atgatg</b> TCTCTGCCAACTGCCAATCTCG   | <b>atgcta</b> TCTCTTCTAAAAAGGCTTATTCTGT |
|                                             | m24 <b>atgatg</b> TCTCTGCCAACTGCCAATCTCG   | <b>ctgcga</b> TCTCTTCTAAAAAGGCTTATTCTGT |
|                                             | m25 <b>atgatg</b> TCTCTGCCAACTGCCAATCTCG   | <b>gtactc</b> TCTCTTCTAAAAAGGCTTATTCTGT |
|                                             | m26 <b>atgatg</b> TCTCTGCCAACTGCCAATCTCG   | <b>tctagc</b> TCTCTTCTAAAAAGGCTTATTCTGT |
|                                             | m27 <b>atgatg</b> TCTCTGCCAACTGCCAATCTCG   | <b>gagtca</b> TCTCTTCTAAAAAGGCTTATTCTGT |
|                                             | m28 <b>cagtca</b> TCTCTGCCAACTGCCAATCTCG   | <b>gctagt</b> TCTCTTCTAAAAAGGCTTATTCTGT |
|                                             | m29 <b>cagtca</b> TCTCTGCCAACTGCCAATCTCG   | <b>atgcta</b> TCTCTTCTAAAAAGGCTTATTCTGT |
|                                             | m30 <b>acgtca</b> TCTCTGCCAACTGCCAATCTCG   | <b>ctgcga</b> TCTCTTCTAAAAAGGCTTATTCTGT |
|                                             | m31 <b>acgtca</b> TCTCTGCCAACTGCCAATCTCG   | <b>gtactc</b> TCTCTTCTAAAAAGGCTTATTCTGT |
|                                             | m32 <b>acgtca</b> TCTCTGCCAACTGCCAATCTCG   | <b>tctagc</b> TCTCTTCTAAAAAGGCTTATTCTGT |
|                                             | m33 <b>acgtca</b> TCTCTGCCAACTGCCAATCTCG   | <b>gagtca</b> TCTCTTCTAAAAAGGCTTATTCTGT |
|                                             | m34 <b>gtcacg</b> TCTCTGCCAACTGCCAATCTCG   | <b>tgcgac</b> TCTCTTCTAAAAAGGCTTATTCTGT |
|                                             | m35 <b>gtcacg</b> TCTCTGCCAACTGCCAATCTCG   | <b>gtcacg</b> TCTCTTCTAAAAAGGCTTATTCTGT |
|                                             | yz1-2 <b>acgtca</b> TCTCTGCCAACTGCCAATCTCG | <b>acgtca</b> TCTCTTCTAAAAAGGCTTATTCTGT |

Note: The 6-nucleotide barcodes were in colors and they were chosen as specific combinations to mark independent plantlets.

**Table S2. Statistics of the sequencing reads generated from barcode-based sequencing**

| Lines                                    | Barcode-sorted unique reads | Lines | Barcode-sorted unique reads | Lines  | Barcode-sorted unique reads |
|------------------------------------------|-----------------------------|-------|-----------------------------|--------|-----------------------------|
| m1                                       | 162                         | m11   | 181                         | m27    | 675                         |
| m2                                       | 622                         | m12   | 645                         | m28    | 61                          |
| m3                                       | 891                         | m13   | 552                         | m29    | 179                         |
| m4                                       | 817                         | yz1-1 | 329                         | m30    | 316                         |
| m5                                       | 497                         | m21   | 320                         | m31    | 257                         |
| m6                                       | 269                         | m22   | 164                         | m32    | 175                         |
| m7                                       | 56                          | m23   | 571                         | m33    | 262                         |
| m8                                       | 192                         | m24   | 724                         | m34    | 181                         |
| m9                                       | 329                         | m25   | 556                         | m35    | 93                          |
| m10                                      | 257                         | m26   | 434                         | yz1-2  | 78                          |
| <b>Total barcode-sorted unique reads</b> |                             |       |                             | 10845  |                             |
| <b>Unique reads</b>                      |                             |       |                             | 137545 |                             |
| <b>Unknown reads</b>                     |                             |       |                             | 99054  |                             |
| <b>Total reads</b>                       |                             |       |                             | 200687 |                             |

**Table S3. Statistics of sequencing reads generated for off-target analysis**

| Off-target site                          | Primers-sorted unique reads | Off-target site | Primers-sorted unique reads |
|------------------------------------------|-----------------------------|-----------------|-----------------------------|
| 15_POT1500                               | 258                         | 21_POT7274      | 414                         |
| 15_POT2941                               | 340                         | 21_POT7350      | 224                         |
| 15_POT3515                               | 415                         | 21_POT9661      | 244                         |
| 15_POT3782                               | 108                         | 21_POT10018     | 447                         |
| 15_POT9381                               | 185                         | 28_POT25        | 370                         |
| 15_POT12615                              | 171                         | 28_POT26        | 124                         |
| 36_POT585                                | 385                         | 28_POT198       | 116                         |
| 36_POT4307                               | 122                         | 28_POT456       | 189                         |
| 36_POT8435                               | 141                         | 28_POT1542      | 235                         |
| 36_POT11074                              | 178                         | 28_POT4528      | 123                         |
| 21_POT1840                               | 289                         | 28_POT4625      | 276                         |
| 21_POT3811                               | 244                         | 28_POT6578      | 569                         |
| 21_POT6973                               | 444                         | 28_POT7818      | 361                         |
| <b>Total primers-sorted unique reads</b> |                             | 6972            |                             |
| <b>Unique reads</b>                      |                             | 337594          |                             |
| <b>Unknown reads</b>                     |                             | 330622          |                             |
| <b>Total reads</b>                       |                             | 953687          |                             |

**Table S4 Primers used for vectors construction, genotyping at on-targets and off-target sites**

| Primers       | Sequences (5' to 3')                                  | Purpose                                                                     |
|---------------|-------------------------------------------------------|-----------------------------------------------------------------------------|
| pGhU6.9 F     | TGATTGCTAGAATTTGCAGTAGGCTT                            | pGhU6.9 promoter amplification                                              |
| pGhU6.9 R     | AGTTATGTGCTGCTTCTTTTCGCTTAT                           |                                                                             |
| midU6-9 R     | TAGCCGTCTCATTTCACATTCATTG                             | pGhU6.9 mutation to destroy the Bsa I site                                  |
| midU6-9 F     | CAATGAATGTGAAATGAGACGGCTA                             |                                                                             |
| infU6-9 F     | TGATTACGCCAAGCTT TGATTGCTAGAATTTGCA GTAGGCTT          | Overlap-extension amplification of pGhU6.9-gRNA-ter for ligation to pRGEB32 |
| infU6-9 R     | AAACCGAGACCTCGGTCTCCTGCC AGTTATGTG CTGCTTCTTTTCGCTTAT |                                                                             |
| gRNA-ter F    | GGCAGGAGACCGAGGTCTCGGTTT                              |                                                                             |
| gRNA-ter R    | CCGAATTTGTGGACCTGCAGGCATG                             |                                                                             |
| inf32B-Kan F  | TTTCGCAGATCCCGGG ATGATTGAACAAGATGG ATTG               | <i>NPT II</i> change at the <i>Hpt</i> site                                 |
| inf32B-Kan R  | TATGGAGAAACTCGAGC TCAGAAGAACTCGTC AAGAAG              |                                                                             |
| PTG-RED1-1 R  | CCTGCCCTTCGCCTGGGACA tgcaccagccgggaat                 | <i>PTG1</i> construction for <i>DsRed2</i> targeting                        |
| PTG-RED1-1 F  | TGTCCCAGGCGAAGGGCAGG gttttagagctagaaata               |                                                                             |
| PTG-RED1-2 R  | CGGTGCGCTCGTACTGCTCC tgcaccagccgggaat                 |                                                                             |
| PTG-RED1-2 F  | GGAGCAGTACGAGCGCACCG gttttagagctagaaata               |                                                                             |
| infRED1 R     | ttctagctctaaaac CGGTGCGCTCGTACTGCTCC                  | <i>PTG2</i> construction for <i>DsRed2</i> targeting                        |
| PTG-RED2-1 R  | CGAGTTCGAGATCGAGGGCG tgcaccagccgggaat                 |                                                                             |
| PTG-RED2-1 F  | CGCCCTCGATCTCGAACTCG gttttagagctagaaata               |                                                                             |
| PTG-RED2-2 R  | GGGTCACGGTCGCCACGCCG tgcaccagccgggaat                 |                                                                             |
| PTG-RED2-2 F  | CGGCGTGCGGACCGTGACCC gttttagagctagaaata               | <i>PTG3</i> construction for <i>DsRed2</i> targeting                        |
| infRED2 R     | ttctagctctaaaac GGGTCACGGTCGCCACGCCG                  |                                                                             |
| PTG-RED3-1 R  | CCCCTACGAGGGCCACAACA tgcaccagccgggaat                 |                                                                             |
| PTG-RED3-1 F  | TGTTGTGGCCCTCGTAGGGG gttttagagctagaaata               |                                                                             |
| PTG-RED3-2 R  | GCTTGCGTCCACGTAGTAG tgcaccagccgggaat                  | <i>PTG4</i> construction for <i>GhCLA1</i> targeting                        |
| PTG-RED3-2 F  | CTACTACGTGGACGCCAAGC gttttagagctagaaata               |                                                                             |
| infRED3 R     | ttctagctctaaaac GCTTGCGTCCACGTAGTAG                   |                                                                             |
| PTG-CLA1-1 R  | AGCAAATCGGTGGGCCTATG tgcaccagccgggaat                 |                                                                             |
| PTG-CLA1-1 F  | CATAGGCCACCGATTTGCT gttttagagctagaaata                | <i>PTG5</i> construction for <i>GhCLA1</i> targeting                        |
| PTG-CLA1-2 R  | GTTGCCGATCGAACTTCAC tgcaccagccgggaat                  |                                                                             |
| nPTG-CLA1-2 F | GTGAAGTTCGATCCGGCAAC gttttagagctagaaata               |                                                                             |
| infCLA1 R     | ttctagctctaaaac GTTGCCGATCGAACTTCAC                   |                                                                             |
| PTG-CLA2-1 R  | ATACCACCTGTGGGAGCTTT tgcaccagccgggaat                 | <i>PTG5</i> construction for <i>GhCLA1</i> targeting                        |
| PTG-CLA2-1 F  | AAAGCTCCCACAGGTGGTAT gttttagagctagaaata               |                                                                             |
| PTG-CLA2-2 R  | TGATACTTGTGACGAGCTCT tgcaccagccgggaat                 |                                                                             |
| PTG-CLA2-2 F  | AGAGCTGCTGACAAGTATCA gttttagagctagaaata               |                                                                             |
| infCLA2 R     | ttctagctctaaaac TGATACTTGTGACGAGCTCT                  |                                                                             |

| Table S4 continued |                                                    |                                                                         |
|--------------------|----------------------------------------------------|-------------------------------------------------------------------------|
| pG32-9 F           | CAGCACATAACTGGCA <del>aa</del> caaaagcaccagtggctag | Infusion ligation of <i>PTG</i> genes to expression vector              |
| infpG32-9 F        | CAGCACATAACTGGCAAACAAA                             |                                                                         |
| u6-9 F             | GTCAAAAACATATCCACATTGCTAA                          | Clone verification with PCR and sequencing                              |
| ubi2 R             | CTGGCTTCCGCCTTGACCCG                               |                                                                         |
| gtCas9 F           | GCTTGTGCGTTTCGATTTGA                               | Transgenic <i>Cas9</i> positivity verification                          |
| gtCas9 R           | CCGCTCGTGCTTCTTATCCT                               |                                                                         |
| 35S F              | GTGGAAAAGGAAGGTGGCT                                | <i>DsRed2</i> positivity check                                          |
| RED R              | CTACAGGAACAGGTGGTGGCGGCC                           |                                                                         |
| CLA1 F             | GGATGGCTGTGGGAAGGGATCTGAAAGGTG                     | Full length <i>GhCLA1</i> , TA cloning for sgRNA9-sgRNA10 editing check |
| CLA1 R             | CATAAGCCCTTTGCATGAATGATGAGTAGAT                    |                                                                         |
| sCLA-1 F           | CTCGACGGACCTATAACCACCTGTGG                         | TA cloning for sgRNA7-sgRNA8 editing check with primer 'CLA1 R'         |
| sgR9 R             | GCCTTTCTCAGTGACAACATGGATC                          | T7E1 assay for target sgRNA9 with primer 'CLA1 F'                       |
| sgR7 F             | GGTAAGTAGAAATGAATAGAACCCAGAAAA                     | T7E1 assay for target sgRNA7 with primer 'sgR9 R'                       |
| sgR8 F             | TTTAGTTTCTATTCTCAAAGAGGTTAAGACT                    | T7E1 assay for target sgRNA8                                            |
| sgR8 R             | GTTTAATCCGGTTCACCTCCCATTGCAGCA                     |                                                                         |
| sgR10 F            | TTTAGTTTCTATTCTCAAAGAGGTTAAGACT                    | T7E1 assay for target sgRNA10                                           |
| sgR10 R            | GACTGGGTAGCAGAATTGCCTTTGA                          |                                                                         |
| 28_POT25 F         | GACTTCGCTTCATTGCCTGA                               | Off-target site amplification                                           |
| 28_POT25 R         | TCTTATGGTCGAGTCTGACGAA                             |                                                                         |
| 28_POT26 F         | TGCATGTGGTAGAGCTTCTGA                              |                                                                         |
| 28_POT26 R         | TTTTACACAGATTCAATCAAACACC                          |                                                                         |
| 28_POT198 F        | GGGTCGCCAGTTAGAAGAAA                               |                                                                         |
| 28_POT198 R        | TTGTGAACCTGGTTGGCAAG                               |                                                                         |
| 28_POT456 F        | TTTGTTTTATTGCCCGAGGA                               |                                                                         |
| 28_POT456 R        | ATCCGGATGTTATGGTCGAG                               |                                                                         |
| 28_POT1542 F       | GCCTGAGGATTCAAGCTAACA                              |                                                                         |
| 28_POT1542 R       | CGATCTTTTTCTTCATATCTGGTTG                          |                                                                         |
| 28_POT4528 F       | GCATAACTGGCAGCAAGGAT                               |                                                                         |
| 28_POT4528 R       | TGGTCACACCCTGGAGCTAT                               |                                                                         |
| 28_POT4625 F       | TGGCTTTTCTACACTGCTCAA                              |                                                                         |
| 28_POT4625 R       | CGGATGTGCCAGGATTAGAT                               |                                                                         |
| 28_POT6578 F       | TTCAATCATCTCGCCAAACA                               |                                                                         |
| 28_POT6578 R       | AGCAATATGCCCAAAGATGG                               |                                                                         |
| 28_POT7818 F       | TGCAAGAGCTGTCAAGGATG                               |                                                                         |
| 28_POT7818 R       | TCAAAAGCAACAACGTTTCA                               |                                                                         |
| 36_POT585 F        | CAACTACTGCACAGGCCAAA                               |                                                                         |
| 36_POT585 R        | AAAATAAAATTCTCGTCTGACATGAT                         |                                                                         |

|               |                            |                           |
|---------------|----------------------------|---------------------------|
| 36_POT585 R   | AAAATAAAATTCTCGTCTGACATGAT | <b>Table S4 continued</b> |
| 36_POT4307 F  | TGGTTGCAAACAAAGAGGACT      |                           |
| 36_POT4307 R  | CCTTTGGCTGCTCTGTTGAC       |                           |
| 36_POT8435 F  | GTTTCAAATAAAAAGGAGGTTTGC   |                           |
| 36_POT8435 R  | ACAAATTTAACTCTTAACCTTACACG |                           |
| 36_POT11074 F | TCACCACATGAACCAAATCA       |                           |
| 36_POT11074 R | CTTACTCTGTTTCTTTTCCCATGTT  |                           |
| 21_POT1840 F  | TTGTGCTGCTGTTTCTTTGC       |                           |
| 21_POT1840 R  | CCAAATGGCCCAAAAATAA        |                           |
| 21_POT3811 F  | TTTTGTCTTGCAACACTTTTGG     |                           |
| 21_POT3811 R  | CTGAGCTTCCCAGTTTGTTTG      |                           |
| 21_POT6973 F  | TCAAACGAGGATCTTTTACAG      |                           |
| 21_POT6973 R  | TGGCCTCTTTATGTTTCTAGCAT    |                           |
| 21_POT7274 F  | GCATTACAATGCTCCCTGGT       |                           |
| 21_POT7274 R  | CAACAACAAGTGAGTTTATCACACA  |                           |
| 21_POT7350 F  | CAAGCATCAGGTAGGGCATT       |                           |
| 21_POT7350 R  | CCTACCTTGACACGCCTTCT       |                           |
| 21_POT9661 F  | TTCATGAACAACAGGAATGATTG    |                           |
| 21_POT9661 R  | CCGACTGTTTTGAACCCATT       |                           |
| 21_POT9729 F  | AGAGGCCTGTTTGATTGCAG       |                           |
| 21_POT9729 R  | TGGTGCTATGACTGCAGGAC       |                           |
| 21_POT10018 F | TTCACAAGGGATTTTAGTTGTTC    |                           |
| 21_POT10018 R | CAACAAGTTTCTTCAAGGCTCA     |                           |
| 15_POT1500 F  | CACGAGTTTCCCAAACCTCA       |                           |
| 15_POT1500 R  | CAGACAGGATCCCAATTTCAA      |                           |
| 15_POT2941 F  | CATGATTAATTGTCATGAACTGCT   |                           |
| 15_POT2941 R  | TGAAAATTGGGCTGTTACAAAA     |                           |
| 15_POT3515 F  | ACGGCCGTGACATTTTATTG       |                           |
| 15_POT3515 R  | AGGCAACCCGAGCACTAACT       |                           |
| 15_POT3782 F  | TCAATGGCAACTTCCAAAACCT     |                           |
| 15_POT3782 R  | AGTGGGATGGCAAATTGATG       |                           |
| 15_POT9381 F  | AACAACCTAATTGGTCCAAAATCA   |                           |
| 15_POT9381 R  | GGGTAAATGGATCCCTCCTC       |                           |
| 15_POT12615 F | CTAGGGGCTAGCCGTTTGAT       |                           |
| 15_POT12615 R | TCGCAGAGCACTTCAATAGC       |                           |

Notes: The nucleotide in red capital is a mutation to destroy Bsa I site of original pGhU6.9. The nucleotides highlighted in yellow background represent its overlap with terminus of the digested expression vector. Nucleotides in blue or red lower case represent its match with gRNA and tRNA, respectively.

## Appendix S1 DNA sequence of promoter *pGhU6.9*

>pGhU6.9

TGATTGCTAGAATTTGCAGTAGGCTTTGCAATTAATACATTATTCGAAACCATTAGATGA  
TGCTTAGTATTTAATATTTATCCTCAGCCGATGATGGCTGAGGCCCTCGAGATCATAAACC  
AGTGTA AAAAATTTTGAGACGCTCAATGCCATTTGGATCAAGCAATCCCTCGAGATTGGTT  
ATTTGAAAGCTTCGGAAAATGCGGAAAGGATGGTGAGCTCGAGAATAAGATCAAGGCTA  
AGGAAAAGGAACTTGCCAAAGTGAGCAATAAGCTCGAGGAGGCAGATAACTCATTGGC  
AGACCGGGAGAACAAAGATGCAGAAAAAACTAGGAACCTTCTGCGTGAGAGGTGTTGAC  
TACGATTGCTCGGTGATGTCTCTCATCGACCTAGCGAATGGATGCTACTTTATGCATTAGT  
TACCATTTATATTTCAATTAGAAATGCATCACATAATTGAACTATTGTGTTATATGATTAAT  
TCTCTGTTAAGGAATATCATTCAAAGGGTTATCTGGAACTAACATATCTTTGTCTTCCAG  
AATACGGTTCCAAACAATTCGCTACGACCGACTGCCGTAGAGCAAAGAAGGCCAATGA  
ATGTGAAAT **GAGACC** GCTAGTAGTTGACGATCTGGAGGTTTGTTCCTTCGTGTTCTTTTCA  
TTAATACCACAATACCATATGCATACCCTGTCATGAATATTGTATAATAGAATGTTAGTTTG  
CATAACCTTCCAATATGCTGCAAATAGTTTCCAACATTTTACTCTGTGCTACGATTTAATTC  
TCTGTTAAGGAATATCGTTCAAAGAGTCATCGCGAAAGTAACATCTTTTCTCATCCAGGC  
TGATGAATATGTAATGGAAGTCCAGTGACCGAAGATTCGGAGGTTTGTTCCTTCGGGGAC  
ATACTTCAGGGCCATGGTCAAAAACCTATCCACATTGCTAAAGAACCATAAGGAAGAAG  
CATTTATATAAGCGAAAGAAGCAGCACATAACT

Note: The highlighted “GAGACC”, which was a Bsa I recognition site, is mutated to “GAGACG” to destroy the recognition site to avoid more than two specific Bsa I sites in the final expression vector.

## Appendix S2 Genome DNA Sequences of each potential off-target site

>CLA\_A\_15\_POT1500

ATTTTTCAATAACCGGAGACAAGGATAACACGAGTTTCCCAAACCTCATAGCCTCTCAACAAATCTTA  
AAAATTTTCATGCAAAATAATATATATATATAAAAAGGACCATTGATTTGCTTGGATGGAGACACCCCTAT  
GCTGATGTTGGAGTCTCTTAAATCTCCACTTGCTTCTATGTATAAATTGACTTGTGTTGAGCATCAAATA  
TCTTGAAATTGGGATCCTGTCTGTATTTATATTCTTTGGACT

>CLA\_A\_15\_POT2941

TACCTATCAAAATATGTACAATTAATATAAAACATTAATGTCATGATTAATTGTCATGAACTGCTAACTAT  
CAAAATTCATAAGATCTCCAATTTGCTTGGAAAGGTCCTTTTACACCAAAAAAAGGTTAAAATATGTT  
ATAAGTCCTTGTAGTCTTTGTAAATTTAAAGTTTAGCCTCTATACTTTTGTAACAGCCCAATTTTCAGTA  
GTGTCAGAACAGTGATTTGAGATCACTAAATTCGATGAAGA

>CLA\_A\_15\_POT3515

GACCGTGGCCATGTCGCACGGCCGTGACATTTTATTGTAGCTCGAGTTTGGGAAAATAGTTTCCCTATT  
TTCACGTGGCCCTAAGCACGCCATTTGCTTGGCCGTGTCTCTGTGGAAAACCTGTATTCAAGAGCTC  
CATTAGTAAGTTAGGTGTTGAAGACTAAATTTTAAAGAAGTTAATACAGTTAGTGCTCGGGTTGCCTGC  
CGAGAAGCGCTTATTTGTAGTCTAAGCTCGACTTACCTCTCCATTG

>CLA\_A\_15\_POT3782

TTCATAAAAAATATCTAATATCCATCAATGGCAACTTCCAAAACCTTAAAAATTACAAGAAACAGGTAAA  
AAAATTTACTCATAAGCATAACAATTTGCTTGGTCGACTTTCCTAGCTTGAAAAACCATGAATTCGGC  
TATGGAATGTAAAATGAAGAAGAAACCTATTTCTTTTTACTTAATTTTGTTTTAATTAGTATCCATCAATT  
TGCCATCCCCTATACTATTTAGGGCCTAATTATCACTTAAGT

>CLA\_A\_15\_POT9381

CTAATATTATAGTATGTGATATAGTAATACATAATGTAATAATATATTTTAAAACCTATTAATACATATATATA  
ACAACCTAATTGGTCCAAAATCATAACTAAATTTACCAACCGATTTGCTTGGATTGGCTCGGTTTGGTTG  
GAATCGGTTTTAATTGCTAATTATAATAGATTATATACAATTGCATAATATGTACTATTACATAATTTATTA  
AATAGTATATGAGGAGGGATCCATTTACCCCTGTGTA

>CLA\_A\_15\_POT12615

ATTTTGCAACTGAGTTAAATGATAAATTGTTGTAAAATCTTATTCTAGGGGCTAGCCGTTTGATTGAACA  
TTTGCATGCAAAGGAGTACCGATTTGCTTGGCAACAGGGTAAGCATTGTCATTTCCAGTTCTTATTCC  
CTTTAGTTGCTTTACTCAAACTAAACATGGAGTGCATACACTAGTGTGAATGAGTTTTGGGTTCCCTTA  
ACCTTAATGGAATTGTTTAAGCTATTGAAGTGCTCTGCGAGCAT

>CLA\_A\_21\_POT1840

TCGAAGCAAATACAACCATTGTACTTTTCGTTTTTGTCTTTTGTGCTGCTGTTTCTTTGCCCTTGTCTC  
GTGTCTGTGCAGGTACAGAGGCCAGATGGCGTGGAGGCTCGCAGTGGTGGTATAGGGAGTATGGCGG  
TGACGTGGCACTAGAGGCTGGAGGTTGCGGCGCACCTAGGGCTAGGGTTCCCTAGGTTGGCTGAAAT  
TGTTTTAGTTTTTGGGCCATTTGGGCCTTGTATTTTTAGGCTAGGGTTTACTTCATTTTGGGCCAT

>CLA\_A\_21\_POT3811

AAAATCTAAACCATCAAATGAGGACAACTAACTTGTAAGTTTTGTCTTGCAACACTTTTGGTTAGG  
TTACTTGCTACACTTCTGGTGGAGATACTTAGGGAAAAGCTCCCACAGGTTCTTTAAGAGGGAAACCA  
GGTGGTAGGCCTCCCAGTACTCCTTTTCCTTTGTTCATAGCAGTAGCATTGTTGGAGGACACAAGGTG  
CCCAAATACTATTCAAACAACTGGGAAGCTCAGATCTAACTCCCCCTTAACTCTTCCTTAAAC  
>CLA\_A\_21\_POT6973

ATCTCGCCTTATCTCACCTCTATTTCAAACGAGGATCTTTTCACGGTCATGGCATAGGTCTCAGAGATTT  
CATCTATTGAGCAAAGTCTTTGGGTGGGGATTTTAGAAGTGCCAGCAGGTGGTATAGGAATAAACTATT  
TGACTIONAAAAAGGCAGTGAAAGTTGGCGAAGACTCATTAGCTAACTATGCTAGAAACATAAAGAG  
GCCAATATCTTTGTCTAGAAAATGGACACATAACTCTCAATCATAAGAAGGAAACACAAAGAGGT  
>CLA\_A\_21\_POT7274

CGATTAGGATACGATTTGCATGCCAATAAGGTTAGAACGTGCGCCTGTATGGGATTTGCACTTCAGTGC  
CCCTGTTAGCATTACAATGCTCCCTGGTGTGGTATAGGTAACCATGTGTTTGAGTTATGTTTGGTATAGT  
TCATCGGGCTCCTAATATTCTTACTATGAAATTGTTTGAATGATGTTGAATACCGATTCTGAATTAGATAA  
ATGAGAGTGGAATGACATAAATGTTATATGATTCATGTGTGATAAACTCACTTGTGTTGT  
>CLA\_A\_21\_POT7350

GTAATGCGCCGGTCAAGCATCAGGTAGGGCATTTCATGCACTAGTTGACGGACTCATGCAGCACCTT  
CGGCACTCAAAGAAATCAAAGCTTCCAAAGGTGGGATGGGATGGCTAGGAAAGAACCAACATAAA  
GAAAACAGGAAGGTGAAGCAATTACATTGGTGGCAGATGTTTCAGCGTCAAGGTGGAGTAAAATTAC  
CCAATAGAAGGCGTGTCAAGGTAGGGTTAATGAGTAAAAAAAAGCAGCTTAGGGTACCTAAGTTGAA  
ATA

>CLA\_A\_21\_POT9661  
CAGTCGCATATGCCCTGGTGCCATCTTGAACCTATCTGATGCTTAAGAGAAACATAAAATTCATGAACAA  
CAGGAATGATTGTGTTTTCTTATGGAATGATACAAAATCGCTCCCAATGGTGGTATTGGACTAAAGTCT  
ATATTTCTTGCAGTGGGCCATACAAGGTTCAAATCCTCATTCTTGTATAATAGGTCTCCCTTATGATTTG  
AGAAAATATTTTTCAACATTCAAATGATGAAATATTAATGGGTTCAAACAGTCGGGGTTTC

>CLA\_A\_21\_POT9729  
TTCTATTCAATTTCTACTTACCTTTGCAACCTCTCTTAGTTCTCTAAGAGGCCTGTTTGATTGCAGCCTGC  
TGAGAGCACTGCTCAAAGCTCCCACAGGTGGTGTAGGTCCGTCGAGATTGGCAGTTGGCAGAGAAAC  
TTGTTTATTGTCATTAAGAATAACAATCATATCAGAATCAAGATATCCGGCATTGTTTCATTGCTTCGTAA  
GCTTGTCTGTCAGTCATAGCACCATCACCTATGACAGCAACAACATGATTCCTTTACCTTTTCAG

>CLA\_A\_21\_POT10018



TTTCACAAGGGATTTTAGTTGTTTCATTTATCATGTCTCATTATTTTCACATTAGTTAATATGCATAACATTT  
ATTCAATTTATATCAAAATATAAAATTCAAGAATAAAATTATCACATGTGGTATAGGAGATTATAGACTTT  
TACTACTTTAGTTTCCTTGAGCCTTGAAGAACTTGTTGATCAAATTCCTAAGAATGACATACGTAGTTT  
ACAAGTCTGATGGTGATCTTCTTCATTCTTCCTTCTTGGCGCCATGTTTCCTTACAAT

>CLA\_S\_28\_POT25

AGTGGATTATAATACGGTTGTCTAAATATGATCCAAGTGAGCACATGAAAGAAGACTGATAGCCCGTG  
AAGAAATACAAGACTTCGCTTCATTGCCTGAAGACAGAACTGACAAAGATTATTCGAGAGCCGTCA  
CATCTTGACCTTCTTAAAGGAGCTGACAAGTATCACAGTAATAAGTGAGCAACGAGTCGCAGCCTGGA  
TCGAGCAAAAAAAGGAGTTAATATAGACATCTCTTGGAGAATTCGTCAGACTCGACCATAAGATCATG  
ATATGAAGAGGAAGATAGGTGTCTTCTCTT

>CLA\_S\_28\_POT26

ATACTAAAATAAAAAATACATACCTCCTTAGAAGATCAATAGAATACTACAAAATTTAAAAGTAATAAA  
AAATTAATAAAAAACAATATTTATATGTTTTCTTAAAAGGTCACTAACATGCATGTGGTAGAGCTTCTGA  
CAAGAATAAGGGTCTGTTTGATTGCTAGTAAAATGTTTTTCGTAAAATGATTTCTGGAAAATGTTTTAC  
TTTTTTGTAAAATAATTTACTGAAAATATTTTTCTGGTGTGTTGATTGAATCTGTGTAAAATATTTTTCTACT  
GTTTGACNGTAAAATATTTTTCT

>CLA\_S\_28\_POT198

AAGGTGGGAATTGAAAGAGTGGGTACTATGGGGTTGCATTGTGGGTATTAGTTCTTCAAGGAAAATAG  
GAGATTAGGAAGAGATTGTATTATGGTATGGACCCATAGTTACGACAATCAATTGAGTAAATGCGAAGG  
GTCGCCAGTTAGAAGAAATGGATACAAGTATCACGGATGTGAAATATCGATAATCAGGGGTGAAACCT  
ATGAAAGAACATGGTTTGGGCCAGACCAGGGTCAATGTCTGCAAATGAATGGCTCAGAGAGCATGAG  
GCATTAGCCTTGCCAACCAAGTTCACAAA

>CLA\_S\_28\_POT456

GTGGATTATAACGCGGTTGTCTAAATATGGTCCAAGTAAACACGAAGAAAGAAGGCTGATAGCCCATG  
AAGAAATACATGACTTTGTTTTATTGCCCGAGGATTAATCAATAAAGATTATTCAAGAGCCGTCACG  
TCTTGACTTTCTTAAAGGAGCTGACAAGTATCATGGGGATAAGTGAACAACGAGTCGCAGCCTGGATC  
AAGCAAAAAGGAGTTCATGGGGATGTCTTTTGGAAAATTCACAAGACTCGACCATAACATCCGGATAT  
GAAGAGGAAGATAGGTGTCTTCACTTGA

>CLA\_S\_28\_POT1542

CTTGATAAAGTGGATTATAACACGGTTGTCTAAATATGTTCCAAGTAAACACAATGAAGGAAGATTGAT  
ATTCCATGAAGAAATACAGGACTTTGCTTTATAGCCTGAGGATTCAAGCTAACAAAGATTATTCGAGAG

CTGTCATGTCTTAAAGAAGCTAACGAGTATCACGGGGATAAGTGGGCAATGGGCCGCGATCCAGATCG  
AGCAGAAAGAAAATAATAGAGATATCTTTTGGAAAATTCGTAAGATTTGACCATAACAACCAGATATG  
AAGAAAAAGATCGATATCTTCGCTTGG

>CLA\_S\_28\_POT4528

ATATGTTAGGATGCACATTGTAAAGGCTACAATAGAAGACAAACAACAAAAGATCTGCCAAGATCAAA  
GGCATAACTGGCAGCAAGGATCAAGGGATTAAGAAGGCAAGATATGCAAAAATTAAGGGCAGAACTG  
GAAACAAGTATCAAGGGATTA AAAAGACAAGATTTGACCTAACCTCTAGAAGAGTTTTGTCTAGAAGA  
GTTATCCAATCAAATCTAAAAAATTCTACTTCAAAGTAGCAATAGCTCCAGGGTGTGACCACAAGGTTA  
TGAAGCAGTCAGCACCAATTGTCCCCGTGAA

>CLA\_S\_28\_POT4625

TGTCCAATTTTGAACCCTGCCTACAGCTGCTTCACTTTTAGGGAAGTTGATTTGGTACCTACCGTAGA  
AGAGTATGTGGCTTTTCTACACTGCTCAAGGGTTAAAGTTGACAAGATCTATTCCAGAGTTGCCAACG  
TCCCGCCCTTTGTAAAGAGACTGACGAGTATCACGGGGATGAGCGAGCAATGGATTGCGGCTAGGATT  
AAGTAAAAGTGAGACAGAAGTTGTATTCCTTGAAGAACCTAAGAGATCTAATCCTGGCACATCCGGA  
TATGAAAAAGAGGGTTGATATTTTTGCT

>CLA\_S\_28\_POT6578

CTTGTTTTTTAGTGTTGATCATTGACGCTTTCCCCTGCATCTATCTTCTCACTTCTGATTGTATTTCAA  
TCATCTCGCCAAACATACTATATCTGAGAACTCTTCGTAGCGCTTCCCAACATCTGGTTAATGAATAG  
GGCTTTCAGAGTGTTGATGAAAAGTATCATGGTTTCTTTCTCCAGAAGAGGTGGCTCGACTTGTGTCA  
CTACCTCTCTCCATCTTTGGGCATATTGCTTGAAGCTCTCATTTTGCTTCTTTTTCATATTCTGCAGTGTA  
ATTCTATCAGGTGTCATGTTT

>CLA\_S\_28\_POT7818

ACATAACAATTTTTGGGGACGAAACTGGGGACAGAACTGCTTTCTTAAACAATTTTAGTAGTTTTTTTTTC  
TATAATCTTTGCAAGAGCTGTCAAGGATGACAAGGTTACGAAATCTCCGTGCAGGAGGCAGAGTTGTT  
GACAAATATCACAGAACATATGTTTGTGACAAGGTTACGAAATCTCCATGCTGACAGTATTTTGTTAA  
TTTTGCTGAAAGATCCAGATCTTGTTGAATTTCTTACATATAGACTTATGAAACGTTGTTGCTTTTTGATA  
TTTTAGGGTACACATGGTTTTCATGA

>CLA\_S\_36\_POT585

ATGCTGAGAGAACCGGCCAGCAATCTGATCTGAACAACACTACTGCACAGGCCAAATAAAAATTCCGAAA  
GTGGAGCAATATTGTTAAAAGGAAAGTGATGTTAGAACCGGCAACTAGCCATAAACAGATGCTCCAAT  
CATATCATTAATAAACAATTGGAGAAAAAAAAGAAGAAGAGATAAAAAGATGCTTCAAGTCACTT

AGATAATCATGTCAGACGAGAATTTTATTTTTCTTTTATTTTCAGTTTTTTCATAGAGATGGAAC TAAGC  
AGATGGCATCTGATCAT

>CLA\_S\_36\_POT4307

GGGTCTAAAAC TGTTCATGGTTGCAAACAAAGAGGACTCCACTTTGGCCTTTCCTAGGTGCTGGTGG  
AGGGGTACCCTTAACAATCAATTTGATCCCCAGCAACCTGTAATTGTATCGAGCAATTCGCTCCGGCAA  
CGGGATGTTGGTGTAGACCCTGAGTAGGGAGAGGATGAAGCCTATAGGAAGCCATAGGAAGGTCAAC  
AGAGCAGCCAAAGGGGTTGGCCTTTGGACTAGGCGGCCCTCATGAAATATAACATGGCTTAGAAGCTT  
GTTCCCTTGGCAATGGTTCG

>CLA\_S\_36\_POT8435

TGAAAACCTTACTTAGAATATATTTTAATTTTCAATTTTTTAATAACCAATCCCAGTCAAAGTGTGACTA  
GACCATACTAGTTTCAAATAAAAAGGAGGTTTGC GTGCCAGAGGTAGTGGGAAGTTCGTGACGGCAA  
CTGGGCAA AATTGAAGGGCATCGAGCACGGTTAATTAGAAGACAAAATAGGATAAATTAAGTAATGTG  
TAAACATTTAGGACTATTTTTTTTTTAAATTAATACTAAACTGACAAAACGTGTAAAGGTTAAGAGTTAA  
ATTTGTTATTATGCTAA

>CLA\_S\_36\_POT11074

AGCCAAATCACATGGCTTAGACTTATCACCACATGAACCAA AATCACCATCTCAAGTGAACATAACTAT  
CATCTTTATAACTAGCCTATACATGCCATATTTACATATATCCACAAGTTCAGAAGTTCCAAACGGCAAC  
TGGATAGTGTGATGCGTAACTCCGACTTGTCCAAAATGAGCGAGCTATCGAACCTCTATAAAACATGG  
GAAAAGAAACAGAGTAAGCTTTCTAGCTTAGTAAGCCCGTATAGTTCAGAATTA AACTGACCATTTATA  
CAATTAAGGCAA
